# Supplementary material for: Polymer Bragg stack as color tunable photonic paper
Source: Royal Society of Chemistry journal article supplement (doi:10.1039/c2jm15943k), 2012-01-01

## Electronic supplementary information

### Polymer Bragg Stack as Color Tunable Photonic Paper

By Zhanhua Wang, Junhu Zhang, Jing Xie, Zhaoyi Wang, Yushu Yin, Jiaxin Li, Yunfeng Li, Sen Liang,

Liang Zhang, Liying Cui, Hao Zhang and Bai Yang\*

FTIR spectra of individual PNIPAM-co-PGMA layer before and after UV lighting.

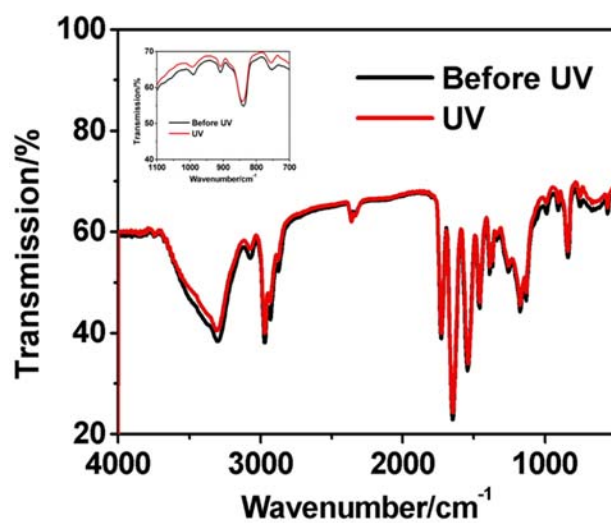

Supplement: c2jm15943k.pdf [file c2jm15943k.pdf]
